# Supplementary material for: Siderophore-mediated zinc acquisition enhances enterobacterial colonization of the inflamed gut
Source: PubMed Central journal article supplement (PMC8636617; doi:10.1038/s41467-021-27297-2), 2021-12-01
Supplement: 41467_2021_27297_MOESM1_ESM.pdf [file 41467_2021_27297_MOESM1_ESM.pdf]

**SUPPLEMENTARY INFORMATION**

**TABLES**

**Supplementary Table 1**

| <b>Strain or plasmid</b>                               | <b>Relevant characteristics</b>                                                                                                                                                                                                                             | <b>Source or Reference</b> |
|--------------------------------------------------------|-------------------------------------------------------------------------------------------------------------------------------------------------------------------------------------------------------------------------------------------------------------|----------------------------|
| <i>Escherichia coli</i> strains                        |                                                                                                                                                                                                                                                             |                            |
| CC118 $\lambda$ pir                                    | F- <i>araD139</i> $\Delta$ ( <i>ara, leu</i> )7697 $\Delta$ <i>lacX74</i><br><i>phoA</i> $\Delta$ 20 <i>galE galk thi rpsE rpoB</i><br><i>argE<sub>am</sub> recA1</i> $\lambda$ pir                                                                         | (Herrero et al., 1990)     |
| DH5 $\alpha$ $\lambda$ pir                             | F- <i>supE44</i> $\Delta$ <i>lacU169</i> $\phi$ 80d <i>lacZ</i> $\Delta$ M15<br><i>recA1 endA1 hsdR17 thi-1 gyrA96</i><br><i>relA1</i> $\lambda$ pir                                                                                                        | (Platt et al., 2000)       |
| DH5 $\alpha$ MCR                                       | F- <i>mcrA</i> $\Delta$ ( <i>mrr-hsdRMS-mcrBC</i> )<br>$\phi$ 80d <i>lacZ</i> $\Delta$ M15 $\Delta$ ( <i>lacZYA-argF</i> )U169<br><i>deoR recA1 endA1 phoA supE44</i> $\lambda$ - <i>thi-1</i><br><i>gyrA96 relA1</i>                                       | (Grant et al., 1990)       |
| S17-1 $\lambda$ pir                                    | F- <i>recA thi pro r<sub>K</sub><sup>-</sup> m<sub>K</sub><sup>+</sup> RP4::2-</i><br><i>Tc::MuKm Tn7</i> $\lambda$ pir                                                                                                                                     | (Herrero et al., 1990)     |
| TOP10                                                  | F- <i>mcrA</i> $\Delta$ ( <i>mrr-hsdRMS-mcrBC</i> )<br>$\phi$ 80d <i>lacZ</i> $\Delta$ M15 $\Delta$ <i>lacX74 recA1</i><br><i>araD139</i> $\Delta$ ( <i>ara-leu</i> )7697 <i>galU galk</i><br><i>rpsL</i> (Str <sup>R</sup> ) <i>endA1 nupG</i> $\lambda$ - | Invitrogen                 |
| EcN                                                    | <i>E. coli</i> Nissle 1917 wild-type                                                                                                                                                                                                                        | Ardeypharm, Germany        |
| JZL95 ( <i>znuA</i> )                                  | EcN $\Delta$ <i>znuA</i> (-82 to +1000)                                                                                                                                                                                                                     | This study                 |
| JZL109 ( <i>znuA</i> )                                 | EcN $\Delta$ <i>znuA</i> (-82 to +1000)::Kan                                                                                                                                                                                                                | This study                 |
| JZL100 ( <i>znuA zupT</i> )                            | EcN $\Delta$ <i>znuA</i> (-82 to +1000) $\Delta$ <i>zupT</i> (-42 to +774)::Kan                                                                                                                                                                             | This study                 |
| JB90 ( <i>ybtX</i> )                                   | EcN $\Delta$ <i>ybtX</i> (-108 to +1281)::Cm                                                                                                                                                                                                                | This study                 |
| JB92 ( <i>znuA ybtX</i> )                              | EcN $\Delta$ <i>znuA</i> (-82 to +1000)::Kan $\Delta$ <i>ybtX</i> (-108 to +1281)::Cm                                                                                                                                                                       | This study                 |
| JB76 ( <i>znuA zupT ybtX</i> )                         | EcN $\Delta$ <i>znuA</i> (-82 to +1000) $\Delta$ <i>zupT</i> (-42 to +774)::Kan $\Delta$ <i>ybtX</i> (-108 to +1281)::Cm                                                                                                                                    | This study                 |
| HZE116 ( <i>irp2</i> )                                 | EcN $\Delta$ <i>irp2</i> (+1 to +6108)::Tet                                                                                                                                                                                                                 | This study                 |
| HZE112 ( <i>znuA zupT irp2</i> )                       | EcN $\Delta$ <i>znuA</i> (-82 to +1000) $\Delta$ <i>zupT</i> (-42 to +774)::Kan $\Delta$ <i>irp2</i> (+1 to +6108)::Tet                                                                                                                                     | This study                 |
| <i>Salmonella enterica</i> serovar Typhimurium strains |                                                                                                                                                                                                                                                             |                            |

|                  |                                                                                            |                              |
|------------------|--------------------------------------------------------------------------------------------|------------------------------|
| IR715            | ATCC 14028s NaI <sup>R</sup>                                                               | (Stojiljkovic et al., 1995)  |
| JZL3             | IR715 $\Delta znuA::Cm$                                                                    | (Liu et al., 2012)           |
| APJ4             | IR715 $\Delta znuA::Cm \Delta zupT::KSAC$                                                  | (Cerasi et al., 2013)        |
| MSC74            | IR715 $\Delta iroN::tetRA$                                                                 | (Sassone-Corsi et al., 2016) |
| Plasmids         |                                                                                            |                              |
| pBS34            | pBluescriptII KS+<br>::[XbaI][PstI]KSAC[PstI][XbaI],<br>Carb <sup>R</sup> Kan <sup>R</sup> | (Raffatellu et al., 2009)    |
| pCRBlunt II-TOPO | TA-Cloning Vector, Kan <sup>R</sup>                                                        | Invitrogen                   |
| pGP704           | <i>oriR6K mobRP4</i> , Carb <sup>R</sup>                                                   | (Miller and Mekalanos, 1988) |
| pHP45 $\Omega$   | Strep <sup>R</sup> Carb <sup>R</sup>                                                       | (Prentki and Krisch, 1984)   |
| pKD3             | Carb <sup>R</sup> Cm <sup>R</sup>                                                          | (Datsenko and Wanner, 2000)  |
| pKD4             | Carb <sup>R</sup> Kan <sup>R</sup>                                                         | (Datsenko and Wanner, 2000)  |
| pJK611           | pKD46:: <i>sacB</i>                                                                        | Kelly T. Hughes              |
| pJB10            | pGP704:: <i>ybtX</i> FR1-Cm-FR2, Cm <sup>R</sup> ,<br>Carb <sup>R</sup>                    | This study                   |
| pNM3             | pCRBlunt II-TOPO:: <i>znuA</i> FR1+FR2,<br>Kan <sup>R</sup>                                | This study                   |
| pNM4             | pRDH10:: <i>znuA</i> FR1-FR2, Cm <sup>R</sup>                                              | This study                   |
| pNM4::KSAC       | pRDH10:: <i>znuA</i> FR1-KSAC-FR2, Cm <sup>R</sup><br>Kan <sup>R</sup>                     | This study                   |
| pRDH10           | <i>oriR6K mobRP4 sacRB</i> , Cm <sup>R</sup> Tet <sup>R</sup>                              | (Kingsley et al., 1999)      |
| pSW172           | <i>oriR101 repA101ts</i> , Carb <sup>R</sup>                                               | (Lopez et al., 2012)         |
| pHZE107          | pGP704:: <i>irp2</i> FR1-Tet-FR2, Tet <sup>R</sup> Carb <sup>R</sup>                       | This study                   |

**Supplementary Table 2**

| Name               | Sequence (5' - 3')              | Source     |
|--------------------|---------------------------------|------------|
| <i>znuA</i> FR1-Fw | CACATTGGATCCGTTGTTTCAGCACCACGAG | This study |

|                    |                                                                  |            |
|--------------------|------------------------------------------------------------------|------------|
| <i>znuA</i> FR1-Rv | TATGCCTCTAGACAAGTCTGGTTTCCCTGG                                   | This study |
| <i>znuA</i> FR2-Fw | TATGCCTCTAGACACACCGCGTTATGTTGG                                   | This study |
| <i>znuA</i> FR2-Rv | CACATTGGATCCCGGAACTGTTTCGCCGTC                                   | This study |
| <i>zupT</i> -Fw    | GTAAGAACCCGGATAACAATGATGATGATCATCA<br>GTTATTGTGTAGGCTGGAGCTGCTTC | This study |
| <i>zupT</i> -Rv    | TGTTGCCTTTAGCAATGGGCAACATCTGTCATTAT<br>CGTCTATGGGAATTAGCCATGGTCC | This study |
| LB_ybtX_fwd        | gccacctgcagatctgcaggCAGACCCAGATGCTGAAC                           | This study |
| LB_ybtX_rev        | gtcacaggtaTCCGCGAATAACACAGAG                                     | This study |
| CmR_fwd            | tattcgcggaTACCTGTGACGGAAGATCACTTCGC                              | This study |
| CmR_rev            | cagggtactcCTTACGCCCCGCCCTGCC                                     | This study |
| RB_ybtX_fwd        | ggggcgtaagGAGTACCCTGCTCAACCACCTGTCCC<br>TC                       | This study |
| RB_ybtX_rev        | aattcccgggagagctcgatAGCCGGGCGCTGCTGGCG                           | This study |
| ybtX_pres_F<br>W   | AAAGAGGGTGAAGTCGACAC                                             | This study |
| ybtX_pres_R<br>V   | GTCTATGCAGTCCTTACCCG                                             | This study |
| ybtX_LB_FW         | CTGACGGAACATAAACGAGC                                             | This study |
| ybtX_RB_RV         | TACAGGTGGTGGTGTATCC                                              | This study |
| Gib_out_LB_<br>FW  | CAATTTGCATAATCGCGTTCAG                                           | This study |
| Gib-out-RB-<br>RV  | AGGGGATGATGGTATTGCGC                                             | This study |
| ybtX_RED_F<br>W    | CACTGATTTTCATCCCTTACCTCTCTGTGTTATTC<br>GCGGAGTGTAGGCTGGAGCTGCTTC | This study |
| ybtX_LB_FW         | CTGGTGATGGAAGAGGGACAGGTGGTTGAGCAG<br>GGTACTCCATATGAATATCCTCCTTA  | This study |

|                          |                                                                  |            |
|--------------------------|------------------------------------------------------------------|------------|
| Gib-out-RB-RV            | AGGGGATGATGGTATTGCGC                                             | This study |
| ybtX_RED_FW              | CACTGATTTTCATCCCTTACCTCTCTGTGTTATTC<br>GCGGAGTGTAGGCTGGAGCTGCTTC | This study |
| ybtX_LB_FW               | CTGGTGATGGAAGAGGGACAGGTGGTTGAGCAG<br>GGTACTCCATATGAATATCCTCCTTA  | This study |
| TetR-F                   | TTAAGACCCACTTTCACATTTAAG                                         | This study |
| TetA-R                   | CTAAGCACTTGTCTCCTGTTTAC                                          | This study |
| pGP704-sall<br>US irp2 F | acctgcagatctgcaggctcgacTCAGTCTGGTGCTGGATG                        | This study |
| TetR-US irp2<br>R        | AATGTGAAAGTGGGTCTTAATCTTCCTCCTGATG<br>GCACG                      | This study |
| TetA-DS irp2<br>F        | AACAGGAGACAAGTGCTTAGCGCGAAGCAA<br>ACTGATTTCC                     | This study |
| pGP704-sacl<br>DS-irp2 R | tcgaattcccgggagagctcTGGCAATATAGTCTTTATCAT<br>TG                  | This study |
| irp2up-TetRA<br>F        | ATGCTTTTTCGGTAAGACGTGCCATCAGGAGGAAG<br>ATTAAGACCCACTTTCACATTTAAG | This study |
| irp2dn-TetRA<br>R        | GATGGCGTTCCGGGGAAAATCAGTTTGCTTCGC<br>GCTAAGCACTTGTCTCCTGTTTAC    | This study |
| irp2-inF                 | ACAACGCTTCCTCGTACAATG                                            | This study |
| Irp2-inR                 | TCTGTTTCGAGCACCTGTTGC                                            | This study |
| Irp2-upF                 | TTTGGCGTAACTCCTTCGAC                                             | This study |
| Irp2-dnR                 | TTCATAAAGTCAATGGAACG                                             | This study |

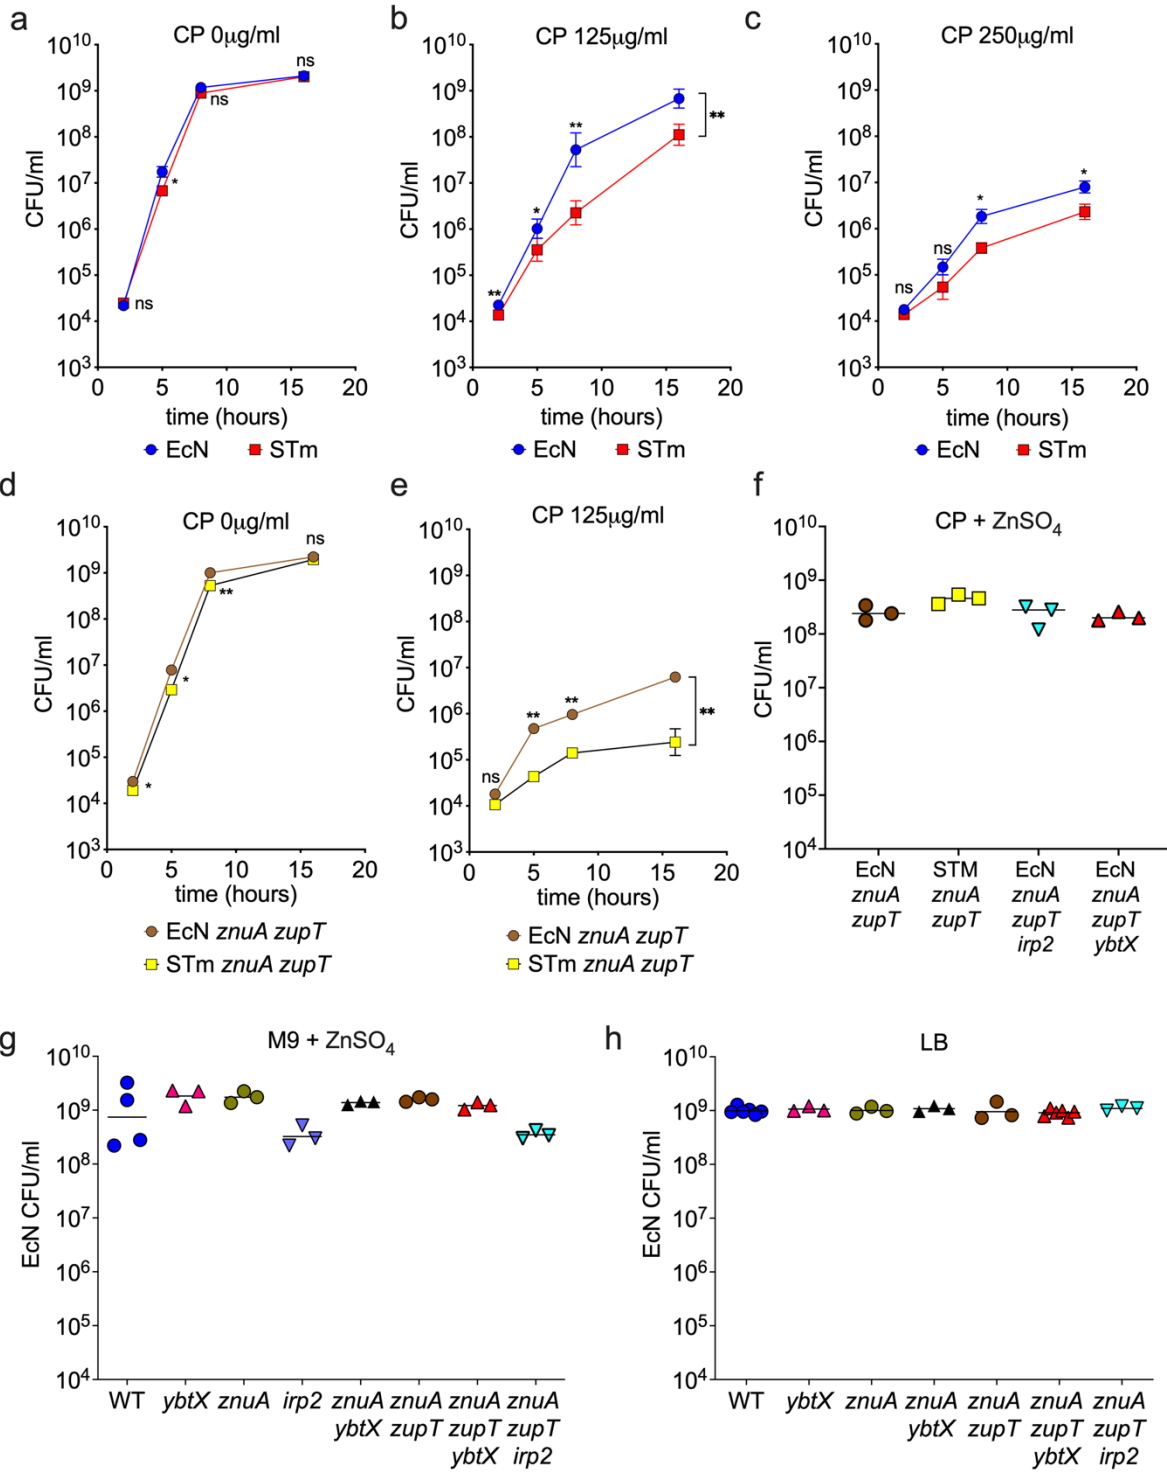

**Supplementary Figure 1. Wild-type and mutant strains grow to similar abundance in rich media or in zinc-limiting media supplemented with zinc.**

(a-f) EcN and STm strains were grown in modified LB medium containing 0, 125, 250 or 150 µg/ml CP and 5 µM ZnSO<sub>4</sub> for 16 h static incubation at 37 °C. For a-e samples were taken 2 h, 5 h, 8 h and 16 h, and for f 16 h after inoculation. Two-sided one sample *t* test was used on log transformed data to accept or reject null hypothesis (theoretical mean = 0). For a-c, EcN *n* = 4 biologically independent replicates, STm *n* = 3 biologically independent replicates. For d-f, *n* = 3 biologically independent replicates. (g) EcN strains were grown in M9 medium supplemented with 5 µM ZnSO<sub>4</sub> for 20 h shaking incubation at 37 °C. Different batches of calprotectin were used for a-e compared to f and main Figure 1. (h) EcN strains were grown in LB medium for 20 h shaking incubation at 37 °C. (f-h) Each symbol represents an independent biological replicate. (a-e) Data are presented as geometric mean values +/- geometric SD. \* *P* value ≤0.05; \*\* *P* value ≤0.01; ns = not significant. Exact *P* values are reported in Supplementary Data 2. Source data are provided as a Source Data file.

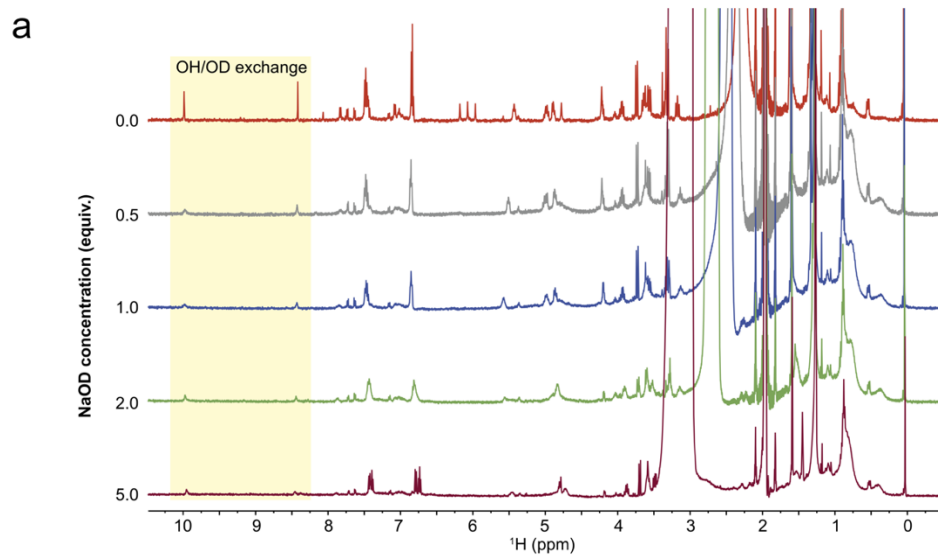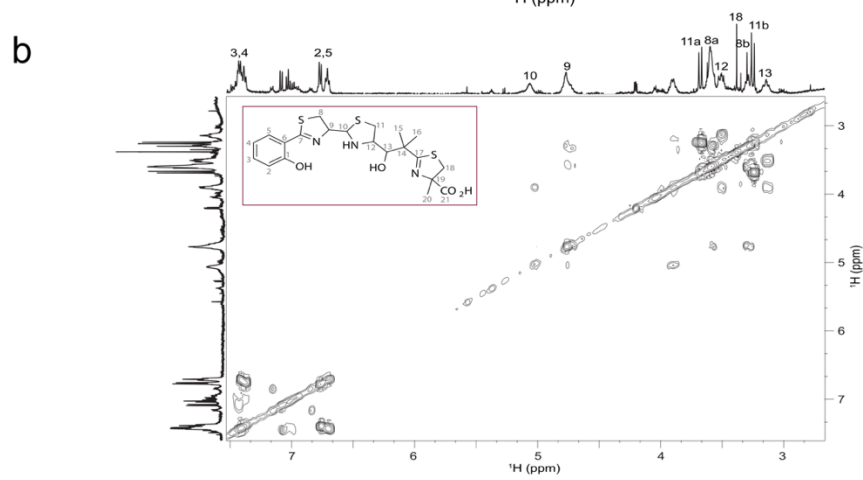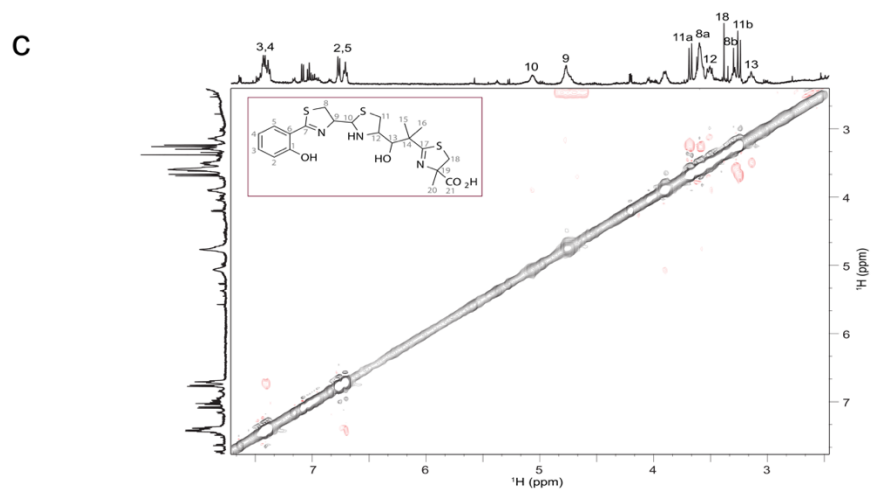

**Supplementary Figure 2. Verification of NMR resonance assignments of Ybt by 2D NMR, and lack of significant changes in Ybt resonances upon the addition of base.**

(a)  $^1\text{H}$  NMR 1D spectra of Ybt dissolved in  $\text{CD}_3\text{CN}$  in the presence of 5.0 equiv. of  $\text{ZnCl}_2$  (top trace, 0 equiv. of NaOD, red trace) and increasing amounts of NaOD (0.5 equiv., gray trace), (1.0 equiv., blue trace), (2.0 equiv., green trace), and (5.0 equiv., brown trace). There are not changes in the spectrum other than the loss of OH signal intensity upon addition of NaOD (highlighted in yellow), which is attributed to increased solvent exchange. The starting spectrum of Ybt in the presence of 5.0 equiv.  $\text{ZnCl}_2$  shows hydrolysis products (signal at 6.2 ppm) in addition to bound and unbound Ybt isomers.

(b) 2D gradient-enhanced  $^1\text{H}$ - $^1\text{H}$  COSY showing aliphatic and aromatic region of spectrum for Ybt dissolved in  $\text{CD}_3\text{CN}$ . (c) 2D gradient-enhanced  $^1\text{H}$ - $^1\text{H}$  ROESY showing aliphatic and aromatic region of spectrum for Ybt dissolved in  $\text{CD}_3\text{CN}$ . All spectra were acquired at 500 MHz.



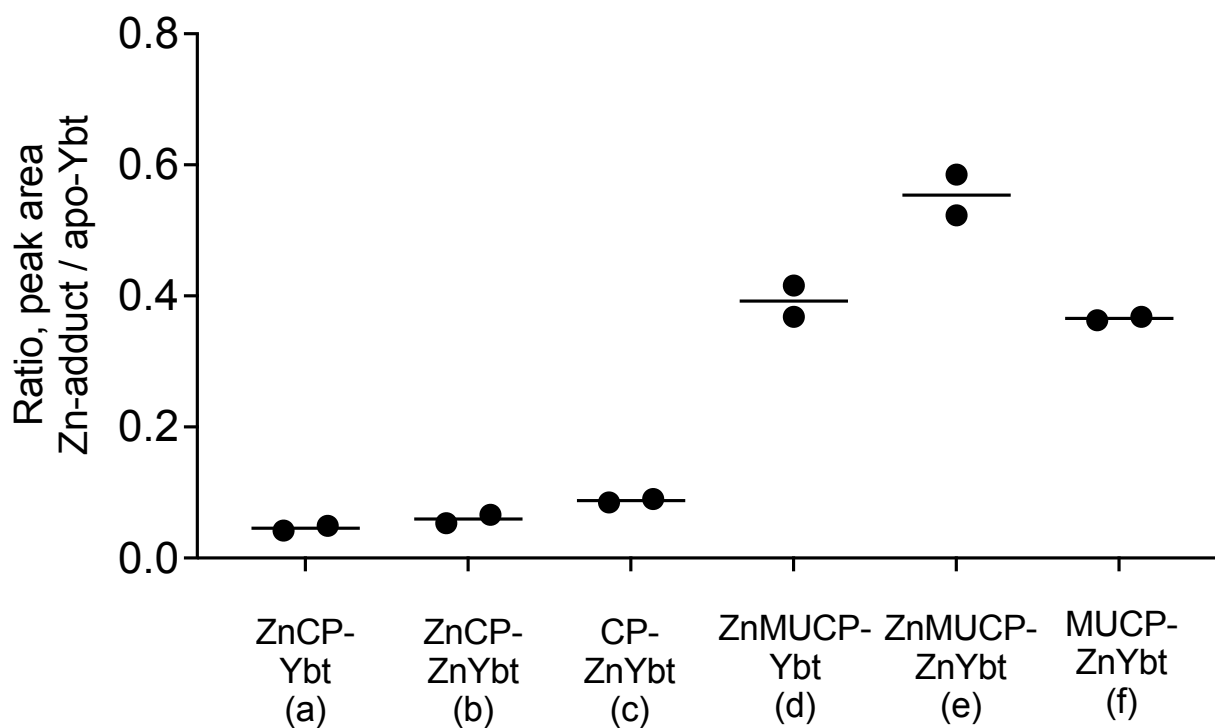

**Supplementary Figure 3. Direct-injection mass spectrometry competition experiments address whether calprotectin (CP) and yersiniabactin (Ybt) exchange zinc.** Competition was carried out between (a) zinc-CP and apo-Ybt, (b) zinc-CP and zinc-Ybt, (c) CP and zinc-Ybt. Control experiments were carried out with mutant-CP (mutCP), which is unable to bind zinc, in place of CP in the following (d) zinc-mutCP and Ybt, (e) zinc-mutCP and zinc-Ybt, and (f) mutCP and zinc-Ybt. Zinc-CP = pre-incubated 0.8 eq Zn and CP-zinc binding site, zinc-Ybt = preincubated with 1eq Zn, zinc-mutCP = preincubated 0.8 eq of Zn with 1 eq mutated CP. Source data are provided as a Source Data file.

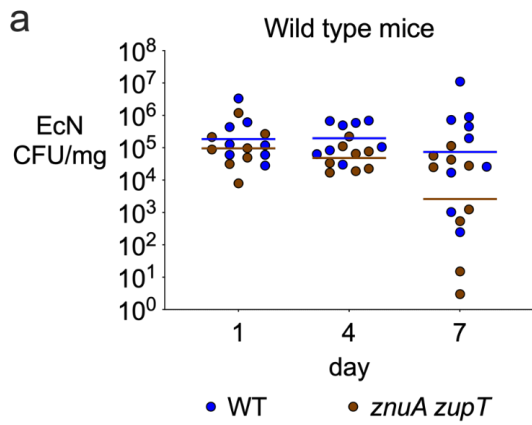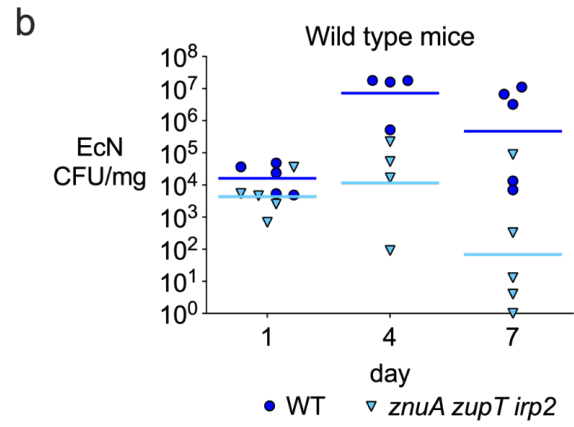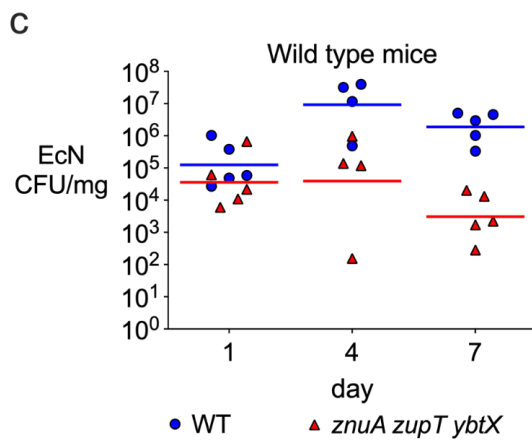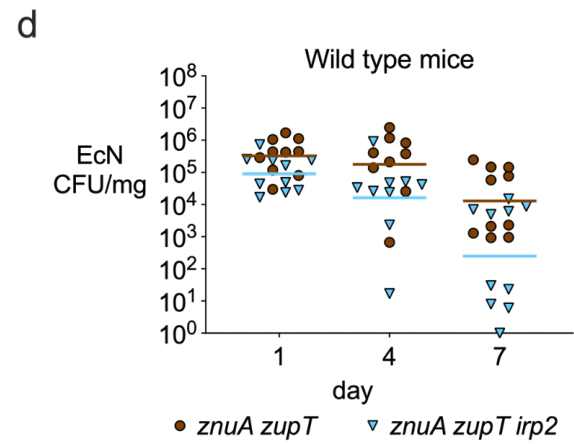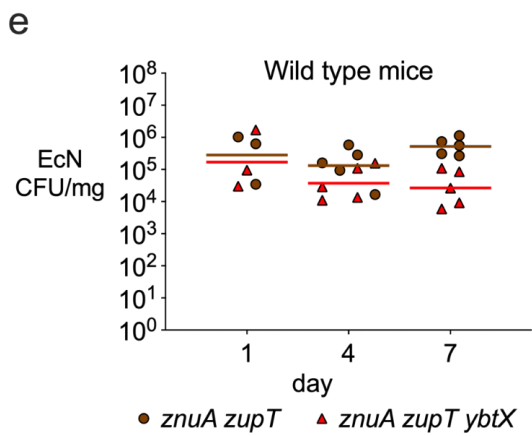

**Supplementary Figure 4. EcN fecal CFU from mice in Figure 4.**

(a-e) CFU of EcN strains in the fecal content of wild-type C57BL/6 mice treated with DSS, all inoculated with the indicated 1:1 mixtures of EcN strains. Dark blue bars represent the geometric mean of EcN wild-type in **a-c**; brown bars represent the geometric mean of the *znuA zupT* mutant in **a, d, e**; light blue bars represent the geometric mean of the *znuA zupT irp2* mutant in **b, d**; red bars represent the geometric mean of the *znuA zupT ybtX* mutant in **c, e**. Each symbol represents data from a biologically independent fecal sample from a single mouse. Source data are provided as a Source Data file.

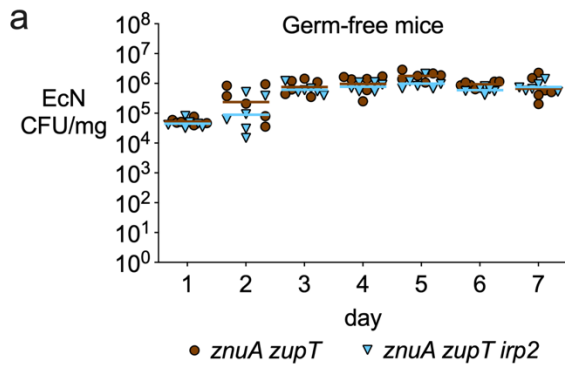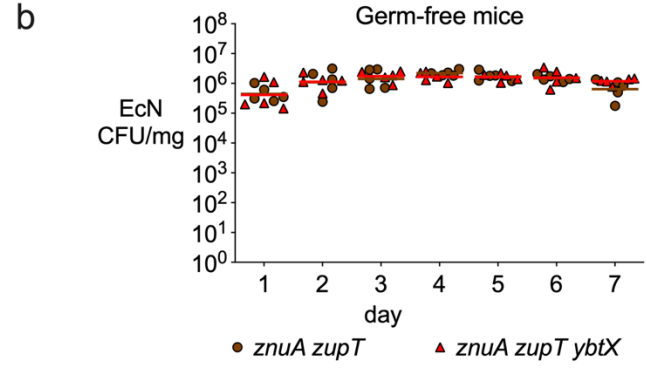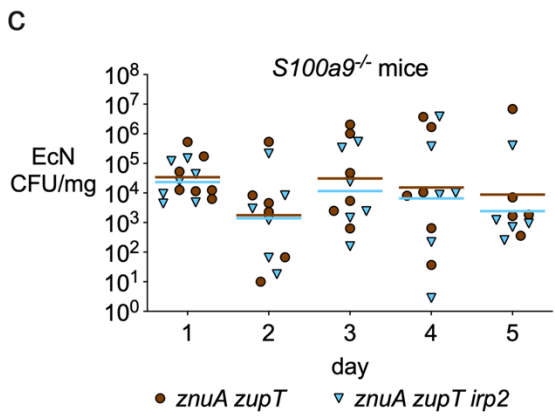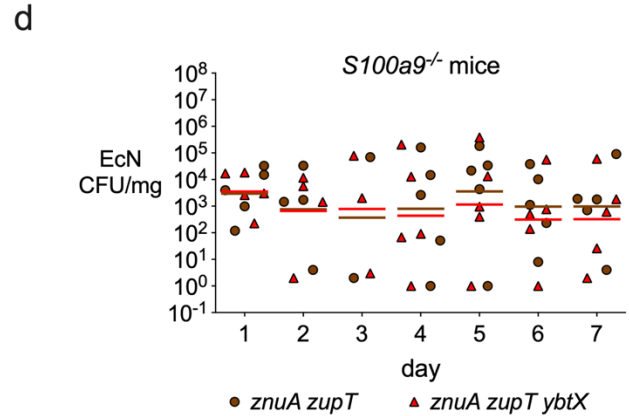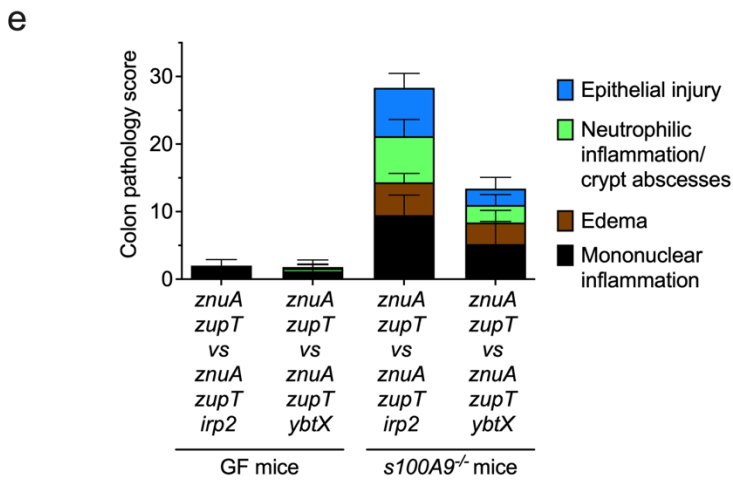

**Supplementary Figure 5. EcN fecal CFU and pathology scores from mice in Figure 5.**

(**a-d**) CFU of EcN strains in the fecal content of (**a, b**) wild-type germ-free Swiss Webster mice or (**c, d**) C57BL/6 *S100a9<sup>-/-</sup>* mice, all inoculated with the indicated 1:1 mixtures of EcN strains. Brown bars represent the geometric mean of the *znuA zupT* mutant in each experiment; light blue bars represent the geometric mean of the *znuA zupT irp2* mutant in **a, c**; red bars represent the geometric mean of the *znuA zupT ybtX* mutant in **b, d**. Each symbol represents data from a biologically independent fecal sample from a single mouse. (**e**) Pathology scores of colonic tissue from germ-free mice in panel **a, b** (day 7) or of colonic tissue from *S100a9<sup>-/-</sup>* DSS-treated mice in panel **c** (day 5) and panel **d** (day 7). Germ-free EcN *znuA zupT* vs *znuA zupT irp2*, n = 6; germ-free EcN *znuA zupT* vs *znuA zupT ybtX*, n = 5; *S100a9<sup>-/-</sup>* mice EcN *znuA zupT* vs *znuA zupT irp2*, n = 6; *S100a9<sup>-/-</sup>* mice EcN *znuA zupT* vs *znuA zupT ybtX*, n = 5; all colon samples are biologically independent. Data are presented as mean values +/- SD. Source data are provided as a Source Data file.

## Supplementary References

1. Herrero, M., de Lorenzo, V., and Timmis, K.N. (1990). Transposon vectors containing non-antibiotic resistance selection markers for cloning and stable chromosomal insertion of foreign genes in gram-negative bacteria. *J. Bacteriol.* 172, 6557–6567.
2. Platt, R., Drescher, C., Park, S.K., and Phillips, G. J. (2000). Genetic system for reversible integration of DNA constructs and LacZ gene fusions into the *Escherichia coli* chromosome. *Plasmid.* 43, 12-23.
3. Grant, S.G., Jessee, J., Bloom, F.R., and Hanahan, D. (1990). Differential plasmid rescue from transgenic mouse DNAs into *Escherichia coli* methylation-restriction mutants. *Proc. Natl. Acad. Sci. U. S. A.* 87, 4645–4649.
4. Stojiljkovic, I., Baumler, A.J., and Heffron, F. (1995). Ethanolamine utilization in *Salmonella typhimurium*: nucleotide sequence, protein expression, and mutational analysis of the *cchA cchB eutE eutJ eutG eutH* gene cluster. *J. Bacteriol.* 177, 1357–1366.
5. J. Z. Liu, S. Jellbauer, A. Poe, M. Pesciaroli, T. Kehl-Fie, N. A. Restrepo, M. Hosking, R. A. Edwards, A. Battistoni, P. Pasquali, T. E. Lane, W. Chazin, T. Vogl, J. Roth, E. P. Skaar, and M. Raffatellu. Zinc sequestration by the neutrophil protein calprotectin enhances *Salmonella* growth in the inflamed gut. *Cell Host and Microbe.* (2012) March; 11 (3); 227-239
6. M. Cerasi, J. Z. Liu, S. Ammendola, A. J. Poe, P. Petrarca, M. Pesciaroli, P. Pasquali, M. Raffatellu, A. Battistoni. The ZupT transporter plays a central role in zinc homeostasis and contributes to *Salmonella enterica* virulence. *Metallomics.* (2014) Mar 26;6(4):845-53
7. M. Sassone-Corsi, S. Nuccio, D. Hernandez, H. Liu, C. T. Vu, A. A. Takahashi, R. A. Edwards, and M. Raffatellu. Microcins mediate competition among Enterobacteriaceae in the inflamed gut. *Nature.* 2016. Dec 8;540(7632):280-283
8. M. Raffatellu, M.D. George, Y. Akiyama, M.J. Hornsby, S. Nuccio, T. A. Paixão, B. P. Butler, H. Chu, R. L. Santos, T. Berger, T. W. Mak, R.M. Tsolis, C.L. Bevins, J. V. Solnick, S. Dandekar and A.J. Bäumler. Lipocalin-2 resistance confers an advantage to *Salmonella enterica* serotype Typhimurium for growth and survival in the inflamed intestine. *Cell Host and Microbe.* (2009) 5(5): 476-486.
9. Miller, V.L., and Mekalanos, J.J. (1988). A novel suicide vector and its use in construction of insertion mutations: osmoregulation of outer membrane proteins and virulence determinants in *Vibrio cholerae* requires *toxR*. *J. Bacteriol.* 170, 2575–2583.
10. Prentki, P., and Krisch, H.M. (1984). In vitro insertional mutagenesis with a selectable DNA fragment. *Gene* 29, 303–313.

11. Datsenko, K.A., and Wanner, B.L. (2000). One-step inactivation of chromosomal genes in *Escherichia coli* K-12 using PCR products. *Proc. Natl. Acad. Sci. U. S. A.* 97, 6640–6645.
12. Kingsley, R.A., Reissbrodt, R., Rabsch, W., Ketley, J.M., Tsolis, R.M., Everest, P., Dougan, G., Bäumler, A.J., Roberts, M., and Williams, P.H. (1999). Ferrioxamine-mediated Iron(III) utilization by *Salmonella enterica*. *Appl. Environ. Microbiol.* 65, 1610–1618.
13. Lopez, C.A., Winter, S.E., Rivera-Chávez, F., Xavier, M.N., Poon, V., Nuccio, S.-P., Tsolis, R.M., and Bäumler, A.J. (2012). Phage-mediated acquisition of a type III secreted effector protein boosts growth of *Salmonella* by nitrate respiration. *MBio* 3. Jun 12;3(3):e00143-12
